# Supplementary material
Source: PubMed Central journal article supplement (PMC11306382)

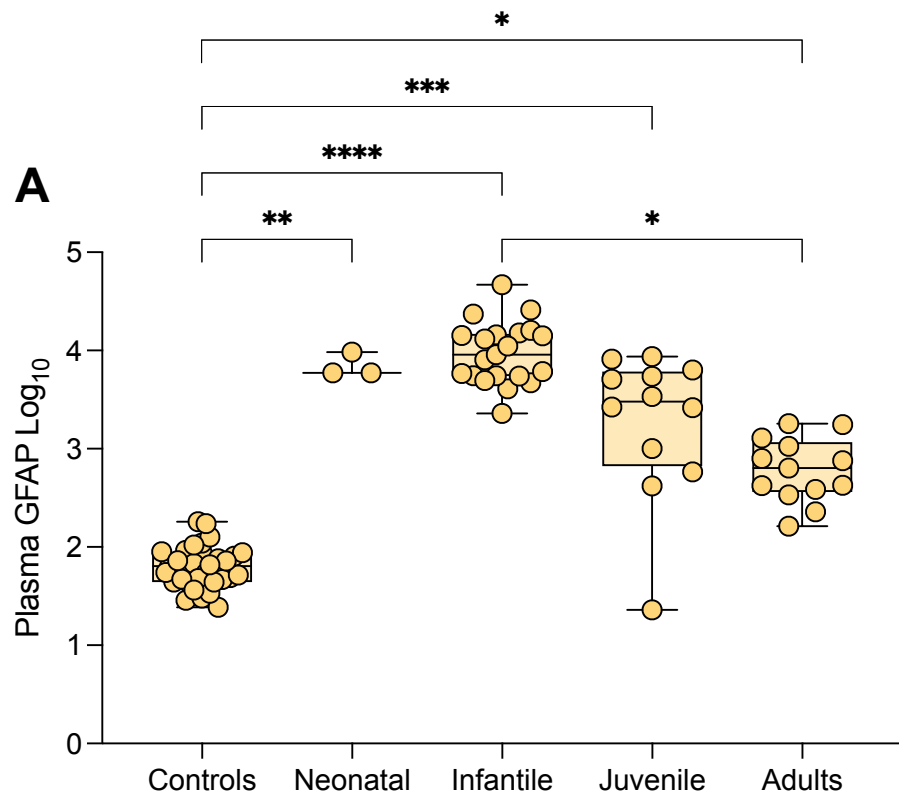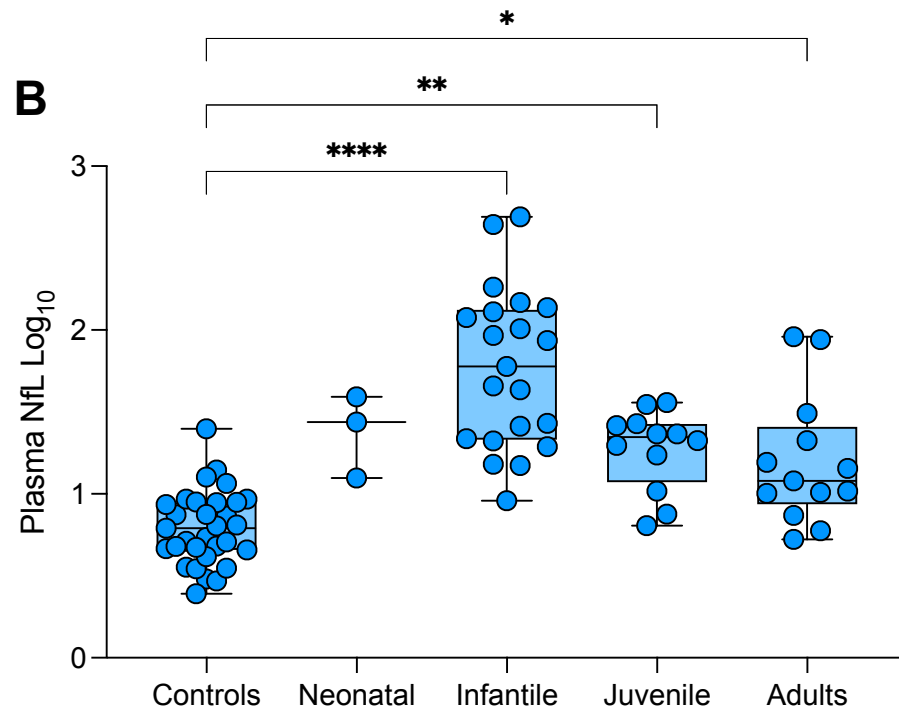

Supplement: 10072_2024_7495_MOESM2_ESM.pdf [file 10072_2024_7495_MOESM2_ESM.pdf]
